# Supplementary material for: Dinactin: A New Antitumor Antibiotic with Cell Cycle Progression and Cancer Stemness Inhibiting Activities in Lung Cancer
Source: MDPI journal article supplement (doi:10.3390/antibiotics11121845), 2022-12-19
Supplement: s1 [file s1]

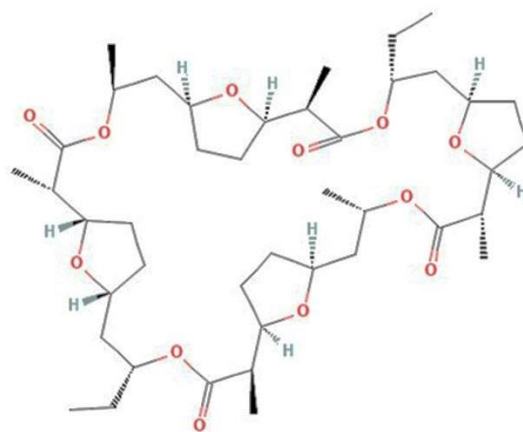

**Figure S1.** The chemical structure of dinactin.

(National Center for Biotechnology Information (2022). PubChem Compound Summary for CID 6916048, Antibiotic 170t. Retrieved September 14, 2022 from <https://pubchem.ncbi.nlm.nih.gov/compound/Antibiotic-170t>.

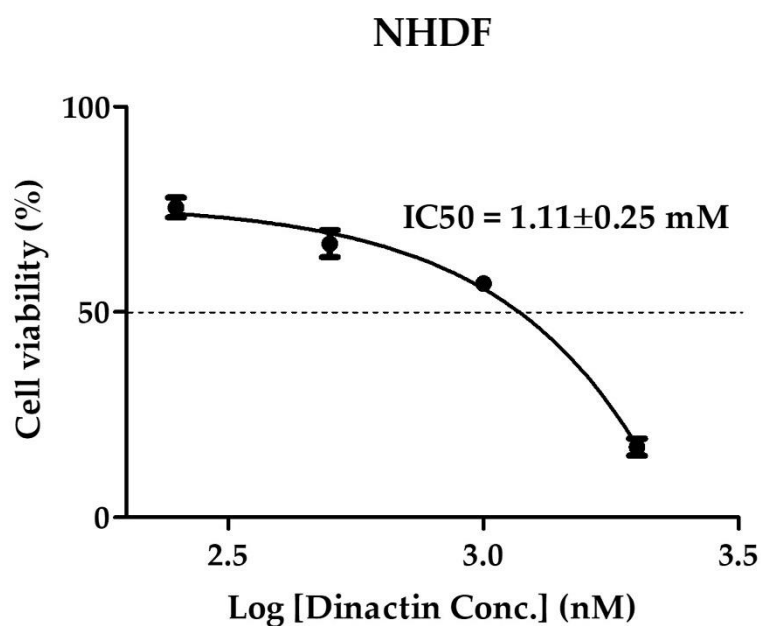

**Figure S2.** The effect of dinactin on Normal Human Dermal Fibroblast (NHDF) cells.

NHDF cells were treated with various concentrations of dinactin from 0, 0.1, 1, 10, 100, and 1000 nM for 4 days. The  $IC_{50}$  values were determined by curve fitting with non-linear regression analysis (sigmoidal dose response). The values were presented as the mean  $\pm$ SD of three independent experiments.

**Table S1.** Specifics real-time PCR primers used.

| Primer name |         | 5'- nucleotide sequence-3' |
|-------------|---------|----------------------------|
| ALDH1A1     | Forward | GCACGCCAGACTTACCTGTC       |
|             | Reverse | CCTCCTCAGTTGCAGGATTAAAG    |
| CD133       | Forward | AGTCGGAAACTGGCAGATAGC      |
|             | Reverse | GGTAGTGTTGTACTGGGCCAAT     |
| Nanog       | Forward | TTTGTGGGCCTGAAGAAACT       |
|             | Reverse | AGGGCTGTCCTGAATAAGCAG      |
| Oct4        | Forward | GTGTTTCAGCCAAAAGACCATCT    |
|             | Reverse | GGCCTGCATGAGGGTTTCT        |
| Sox2        | Forward | TACAGCATGTCCTACTCGCAG      |
|             | Reverse | GAGGAAGAGGTAACCACAGGG      |
| GAPDH       | Forward | TGGTATCGTGGAAGGACTCATGAC   |
|             | Reverse | ATGCCACTCAGCTTCCCGTTCAGC   |

The real-time PCR program used: 95 °C for 5 min, then 45 cycles: 95 °C for 15 sec, melting temperature (T<sub>m</sub>) 60 °C for 5 sec, 72 °C for 10 sec. Relative of target mRNA expression was normalized by GAPDH mRNA expression as an internal control. Results were obtained from at least 3 independent experiments.
